# Supplementary material for: A Pd nanocatalyst supported on multifaceted mesoporous silica with enhanced activity and stability for glycerol electrooxidation
Source: Royal Society of Chemistry journal article supplement (doi:10.1039/c6ra28864b), 2017-01-01
Supplement: c6ra28864b1.pdf [file c6ra28864b1.pdf]

# **Pd nanocatalyst supported on multifaceted mesoporous silica with enhanced activity and stability for glycerol electrooxidation**

Thiago S. D. Almeida,<sup>a</sup> Katia-Emiko Guima,<sup>a</sup> Roberto M. Silveira,<sup>b,c</sup> Gabriel C. da Silva,<sup>d</sup>  
Marco A. U. Martines<sup>b</sup> and Cauê A. Martins<sup>\*</sup>

<sup>a</sup>Faculty of Exact Sciences and Technology, Universidade Federal da Grande Dourados, 79804-970 Dourados, MS, Brazil.

<sup>b</sup>Institute of Chemistry, Universidade Federal de Mato Grosso do Sul, C.P. 549, 79070-900 Campo Grande, MS, Brazil.

<sup>c</sup>Instituto Federal de Educação, Ciência e Tecnologia de Mato Grosso do Sul – Campus Ponta Porã, C.P. 79900-000 Ponta Porã, MS, Brazil.

<sup>d</sup>Instituto de Química de São Carlos/Universidade de São Paulo, IQSC-USP, C.P. 780, São Carlos, SP, Brazil.

---

\* Corresponding Author. Phone: +55 67 9262 4202

e-mail: cauealvesmartins@gmail.com, cauemartins@ufgd.edu.br

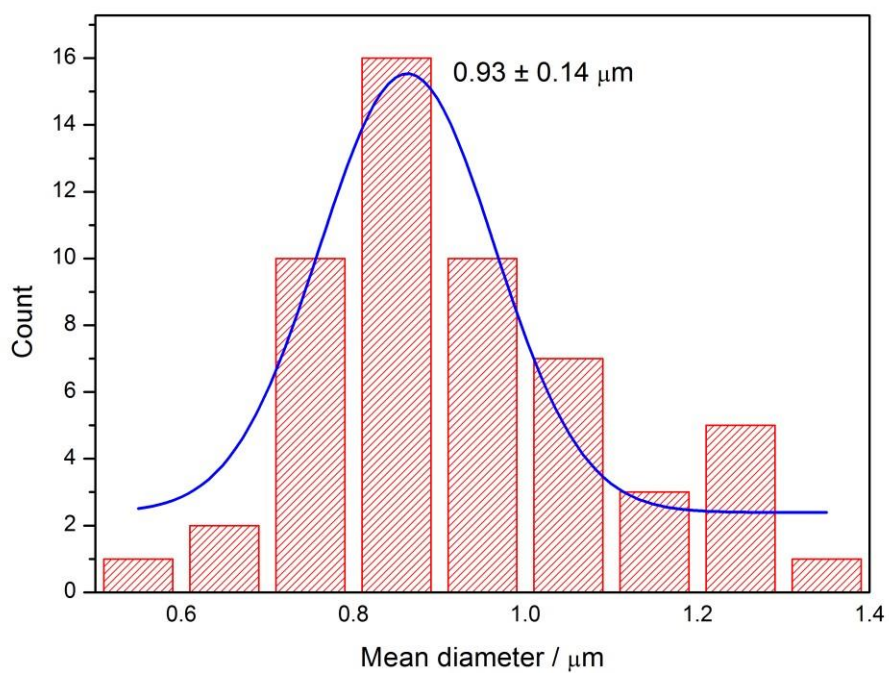

Figure S1. Mean size distribution of multifaceted mesoporous silica ( ).

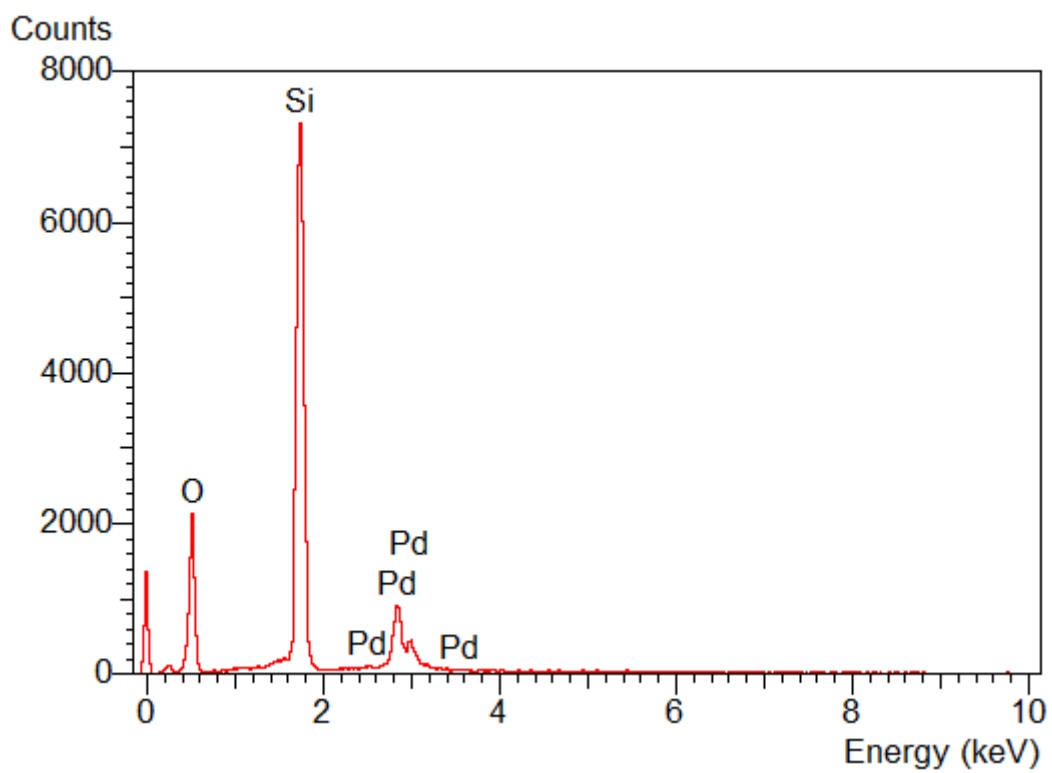

Figure S2. Representative EDS spectrum of Pd/SiO<sub>2</sub> nanoparticles.

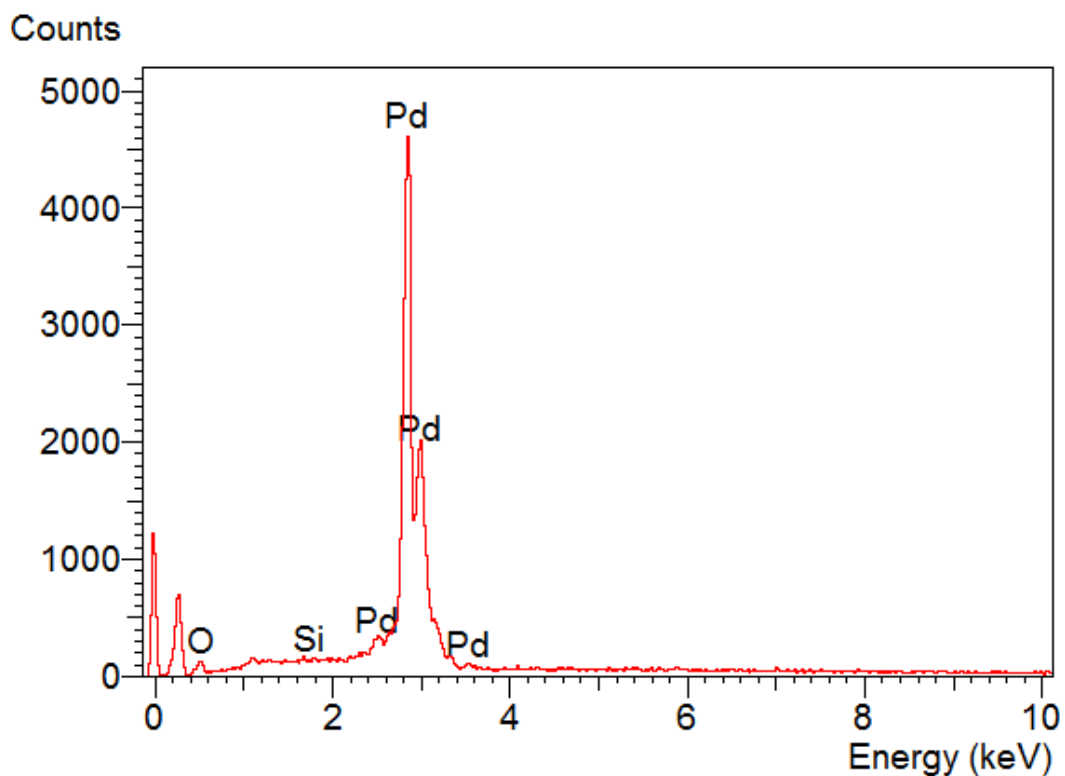

Figure S3. Representative EDS spectrum of Pd nanoparticles after removal of SiO<sub>2</sub>.

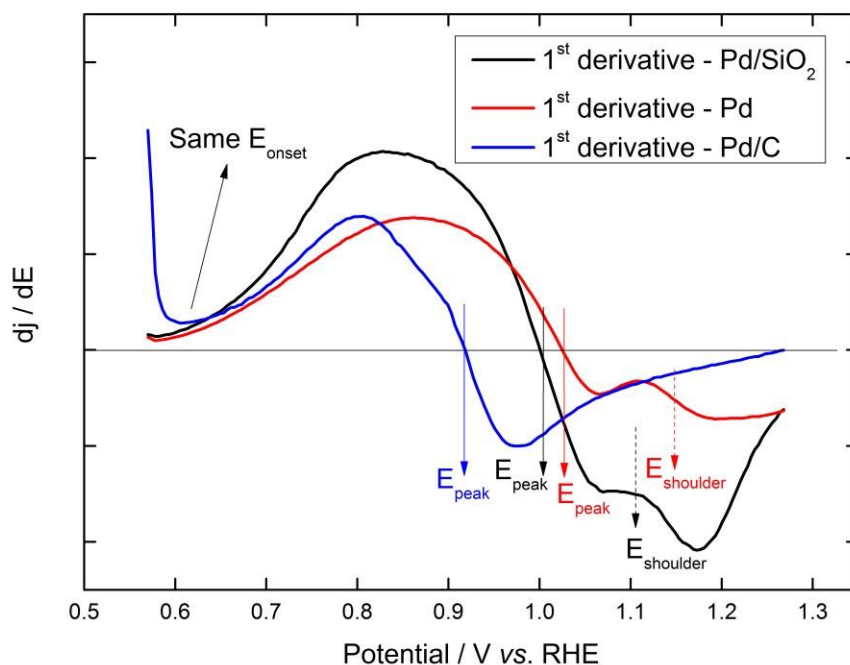

Figure S4. First derivative of the voltammograms of Pd/SiO<sub>2</sub>, Pd and Pd/C in the presence of 0.1 mol L<sup>-1</sup> KOH and 0.2 mol L<sup>-1</sup> GIOH. The figure shows that the onset potential  $E_{\text{onset}}$  are virtually the same for all catalysts. The potential peaks  $E_{\text{peak}}$  are

indicated in the figure. A small shoulder appears for the reaction on Pd/SiO<sub>2</sub> and Pd, but Pd/C, as indicated by E<sub>shoulder</sub>.

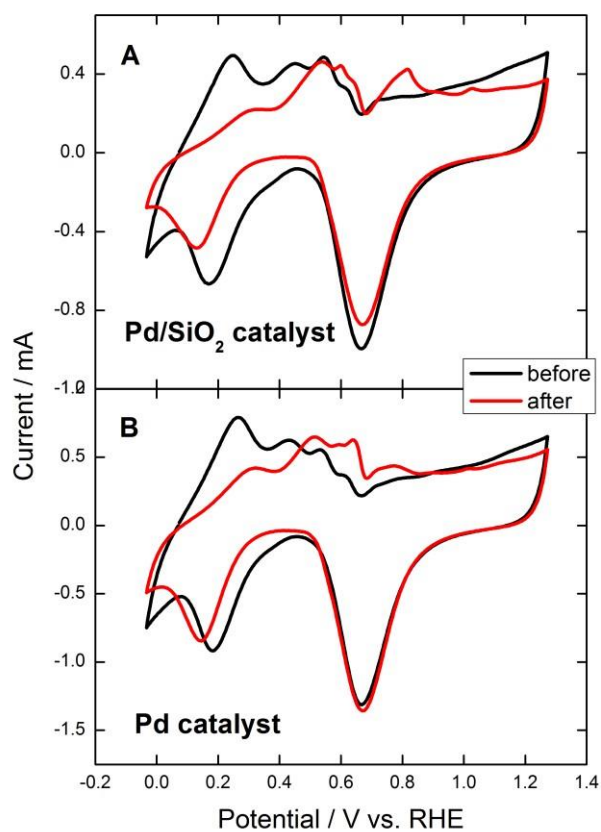

Figure S5. Cyclic voltammograms of (A) Pd/SiO<sub>2</sub> and (B) Pd in the presence of 0.1 mol L<sup>-1</sup> KOH before (black line) and after (red line) the degradation test protocol, which consist in 100 potential cycles between 0.57 and 1.27 V at 0.05 V s<sup>-1</sup> in 0.1 mol L<sup>-1</sup> KOH + 0.2 mol L<sup>-1</sup> GlOH.
